# Supplementary material for: Inflammatory recruitment of healthy hematopoietic stem and progenitor cells in the acute myeloid leukemia niche
Source: PubMed Central journal article supplement (PMC10997516; doi:10.1038/s41375-024-02136-7), 2024-01-16
Supplement: 41375_2024_2136_MOESM1_ESM.pdf [file 41375_2024_2136_MOESM1_ESM.pdf]

# Supplementary Figure 1

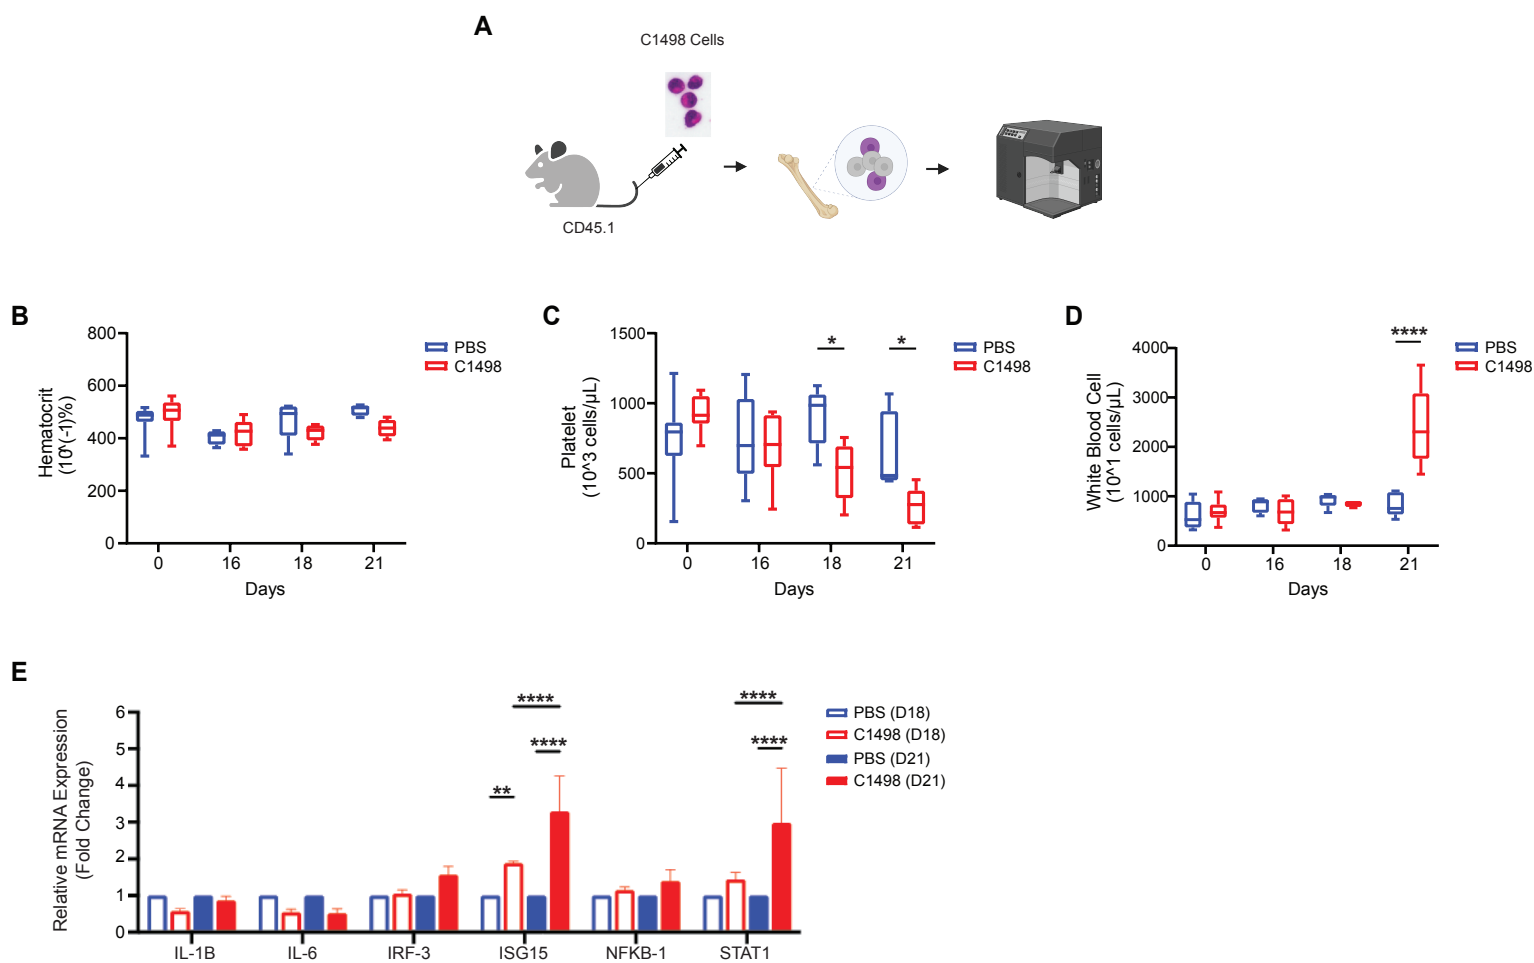

Supplementary Figure 1 – Additional characterization data relating to C1498 model. Complete blood count analysing showing hematocrit (B), platelet (C), white blood cell (D) counts. Quantitative real-time PCR analysis of HSPCs (Lin- cKit+ Sca1+) gene expression 18 and 21 days post C1498 engraftment. Values expressed as mean±s.d., Statistical significance calculated using ANOVA. \* p<0.05; \*\* p<0.01; \*\*\* p<0.001; \*\*\*\* p<0.0001.

# Supplementary Figure 2

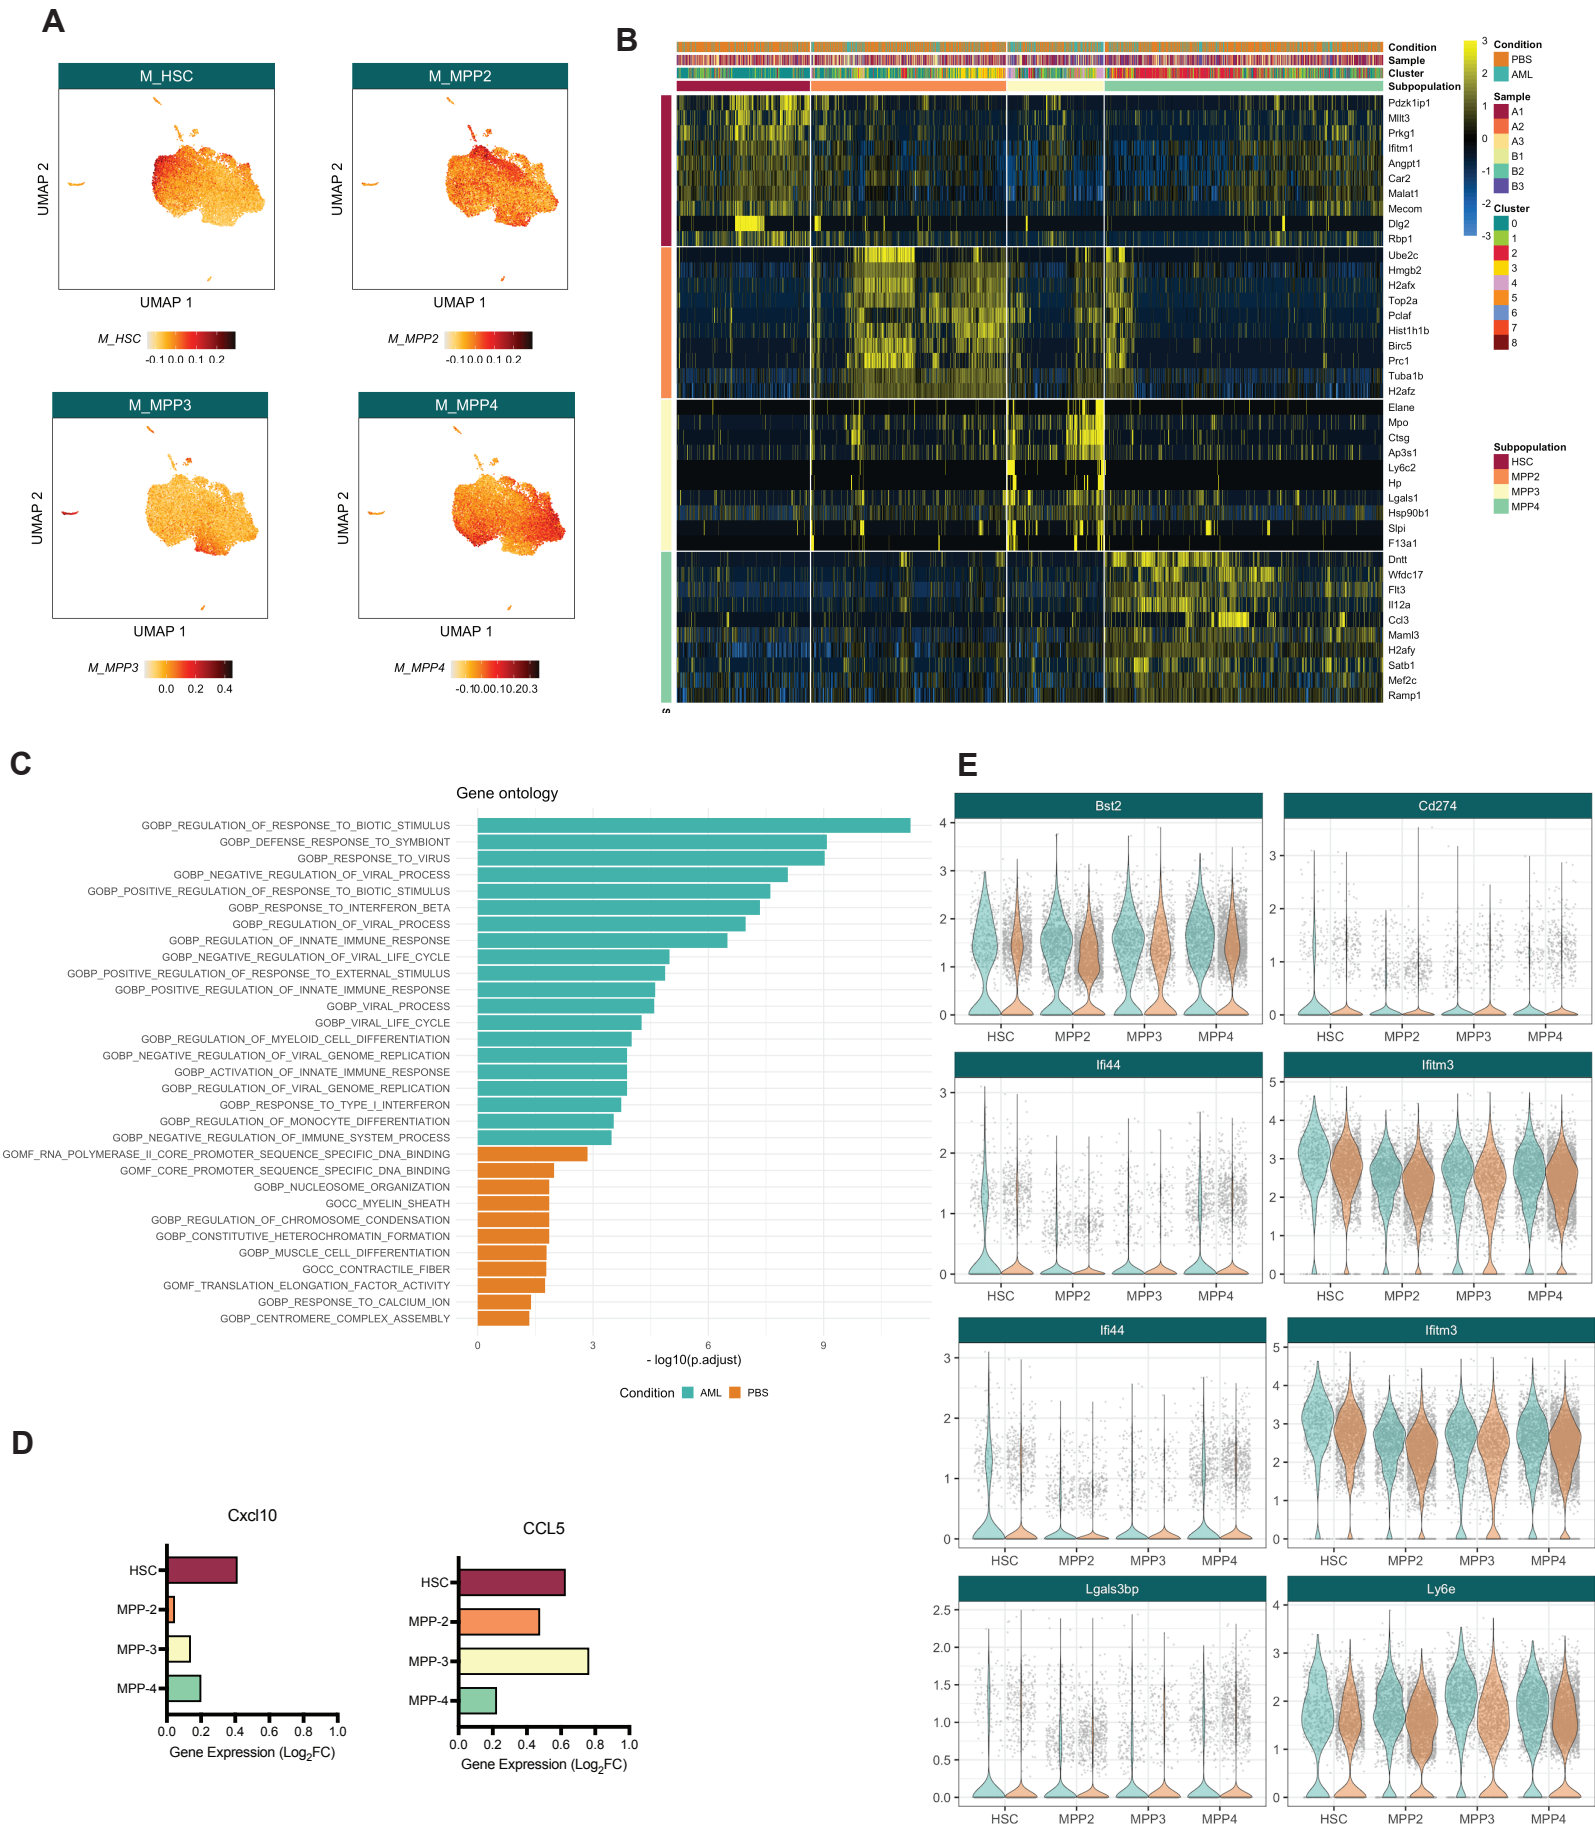

Supplementary Figure 2 – (A) UMAP showing module score of HSC, MPP-2, MPP-3, and MPP-4 gene signatures. (B) Top differentially expressed genes between HSC, MPP-2, MPP-3, and MPP-4 subpopulations. (C) Gene ontology (GO) analysis of enriched processes in HSCs. (D) Selected inflammatory cytokine encoding genes and, (E) leading edge genes from Interferon Response Pathways upregulated in HSC and MPPs in AML.

# Supplementary Figure 3

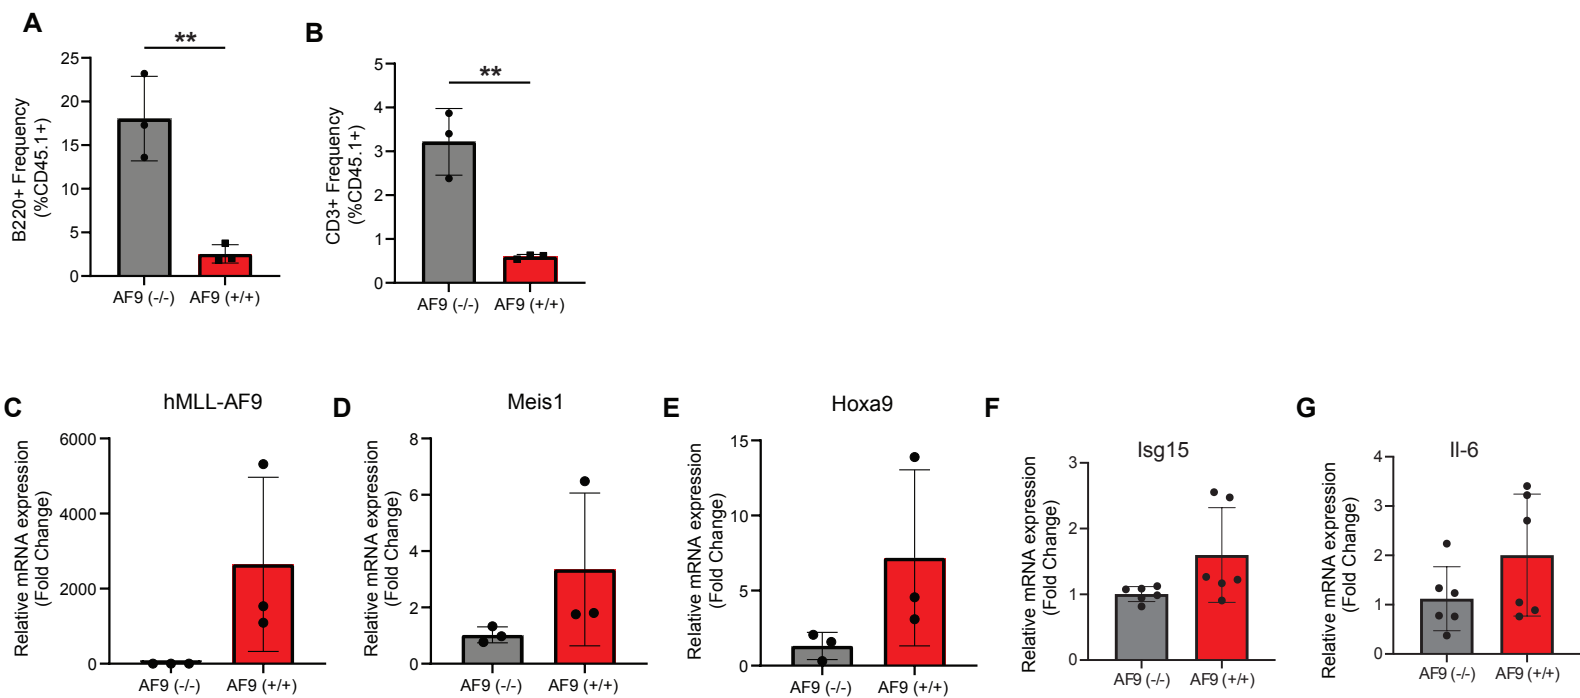

Supplementary Figure 3 – Reduced BM B220+ CD3+ population subsets following DOX-induction in iMLL-AF9 mice (+/+) carrying homozygous MLL-AF9 allele (+/+), compared to control mice without MLL-AF9 allele (-/-) (A-B). Gene expression analysis of AF9 blasts (CD45.1+; C-D) and normal HSPCs (CD45.1/2+; E-G). Values expressed as mean±s.d., Statistical significance calculated using Student's t-test. \* p<0.05; \*\* p<0.01; \*\*\* p<0.001; \*\*\*\* p<0.0001.

# Supplementary Figure 4

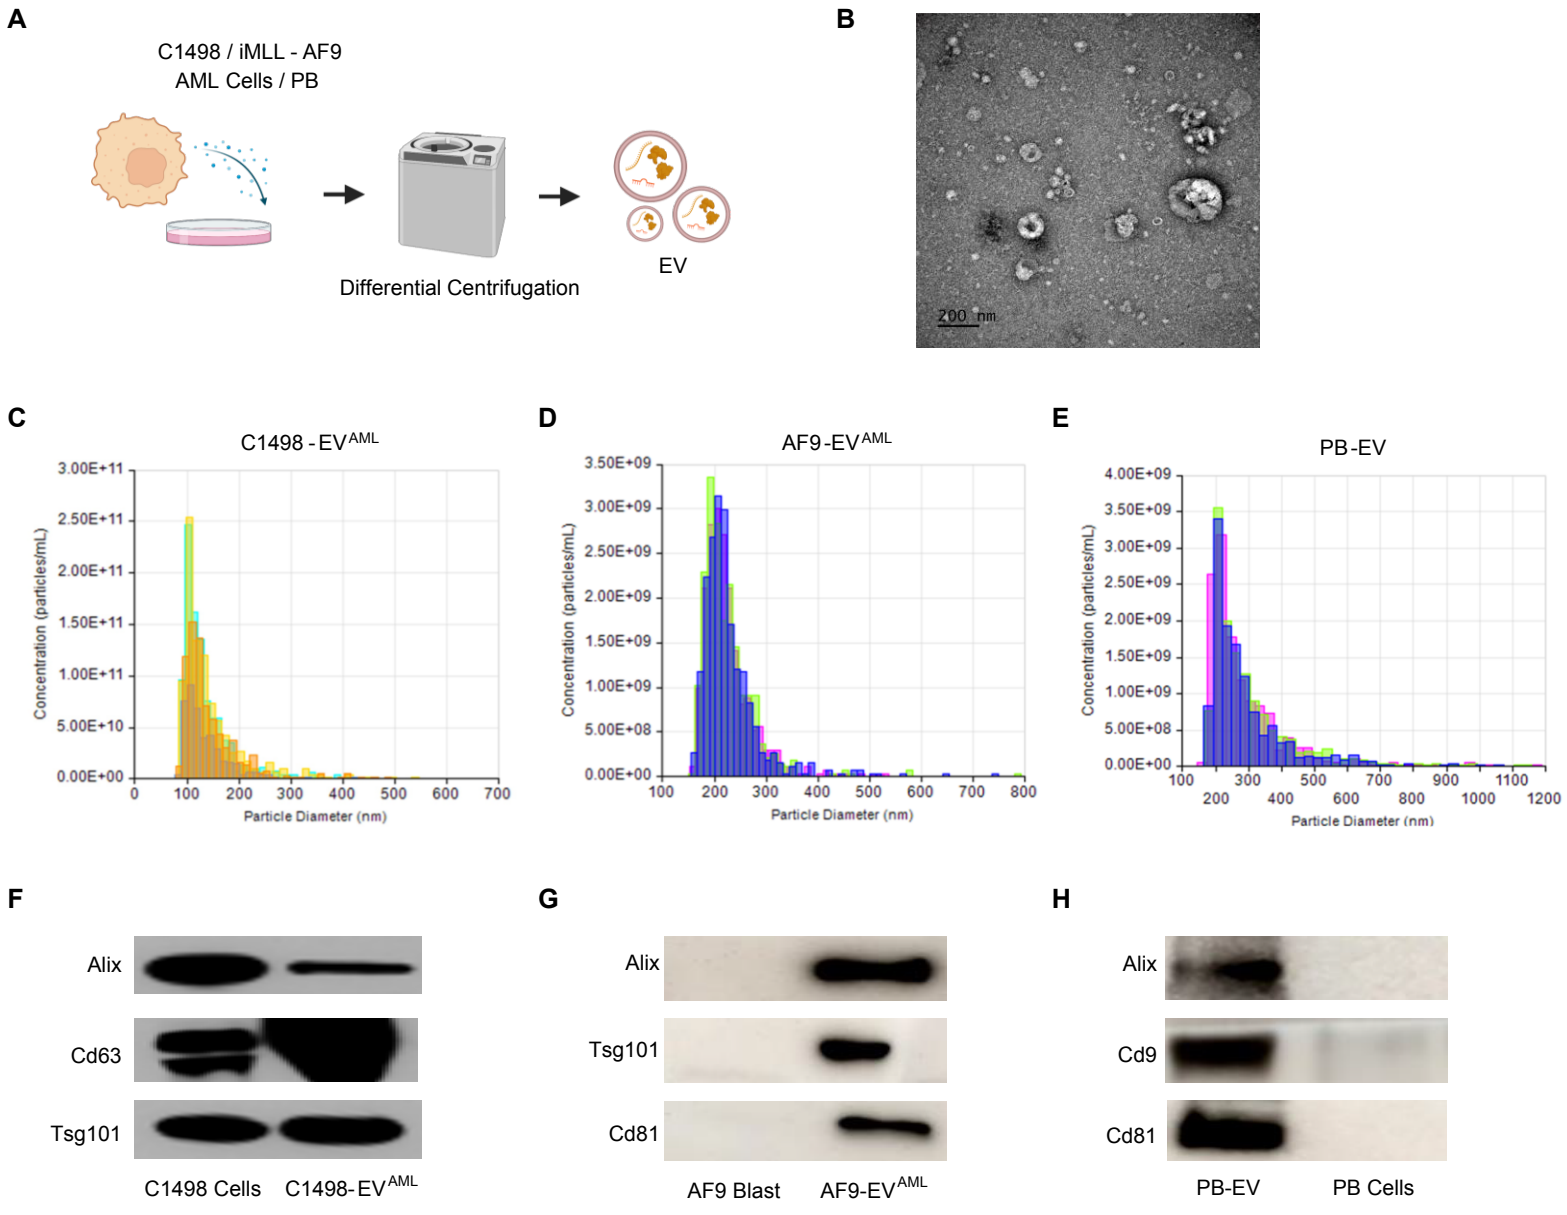

Supplementary Figure 4 – Extracellular vesicle harvest schematic (A). Transmission electron microscopy image of C1498-EV<sup>AML</sup> (B). EV particle quantitation and biomarker characterization for C1498-EV<sup>AML</sup>(C,F), AF9-EV<sup>AML</sup>(D,G), PB-EV<sup>Healthy</sup> (E,H),

# Supplementary Figure 5

**A**

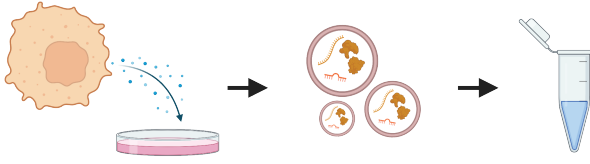

**B**

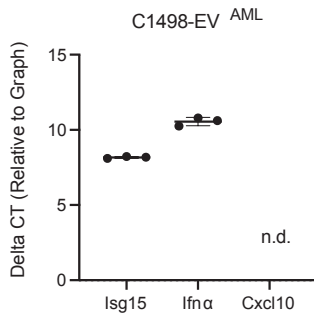

**C**

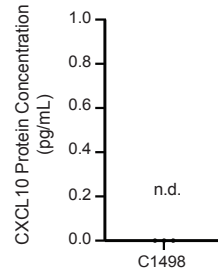

**D**

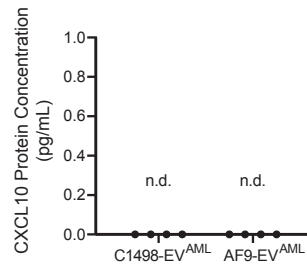

**E**

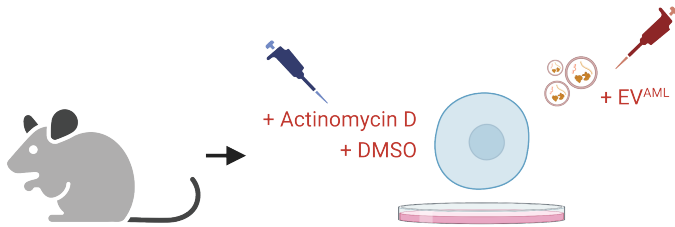

**F**

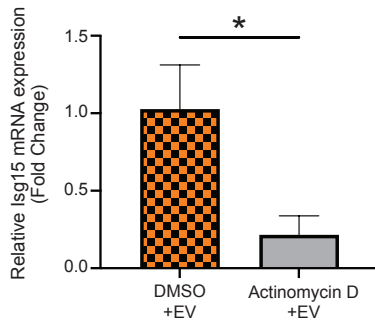

**G**

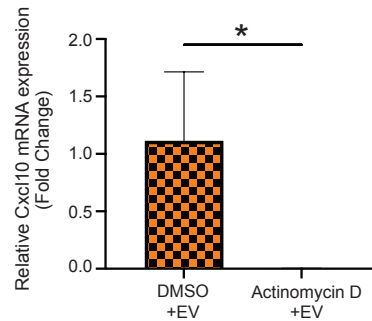

Supplementary Figure 5 - Schematic of RNA analysis in EVs (A) and relative delta CT of target RNA compared to GAPDH (B). Cxcl10 proteins were not detected (n.d.) in C1498-conditioned medium (C) and EV<sup>AML</sup> (D). Schematic of Actinomycin D treatment experiment (E), and the gene expression analysis of HSPCs following EV challenge, with or without Actinomycin D pretreatment (F-G). Values expressed as mean±s.d., Statistical significance calculated using Student's t-test. \* p<0.05. n.d. represent not detected.

# Supplementary Figure 6

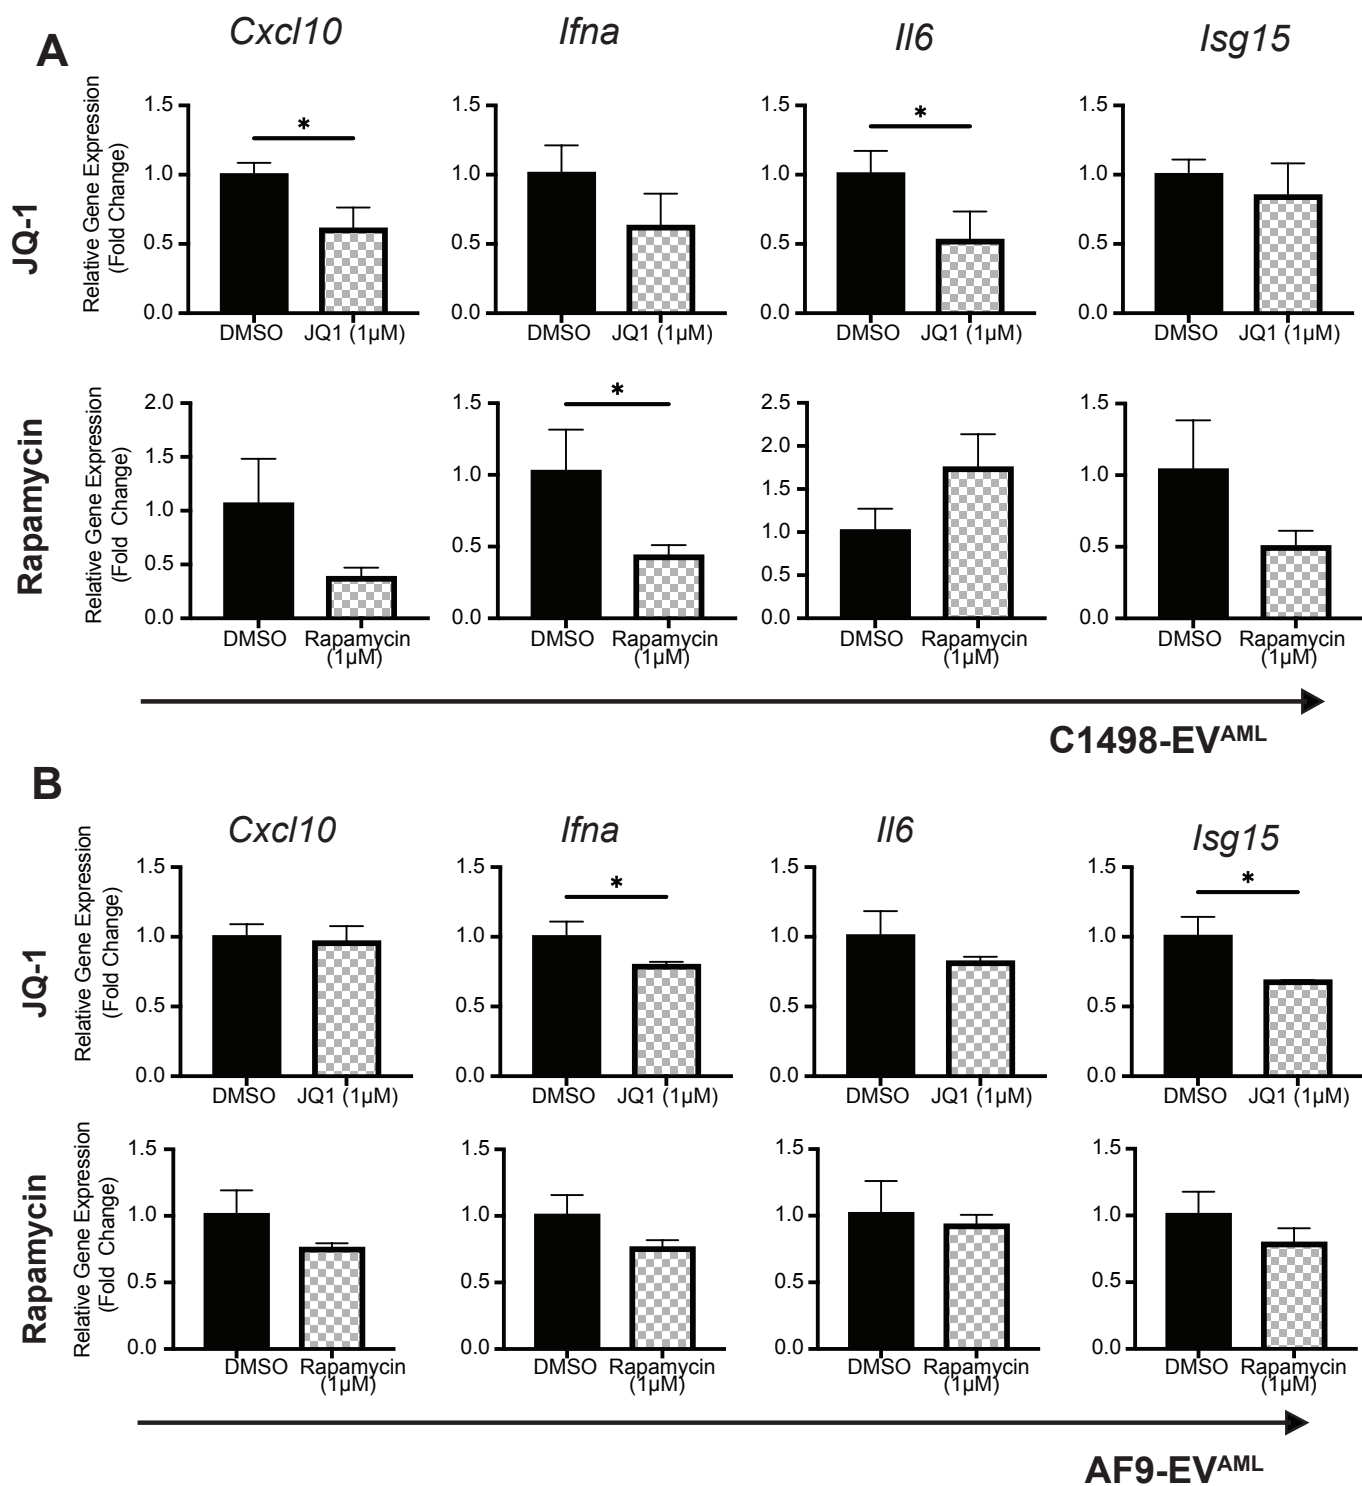

Supplementary Figure 6 - Multiple pathways are involved in EV<sup>AML</sup>-mediated inflammatory responses in HSPCs. Differential gene expression analysis in FACS-sorted HSPCs pretreated with small molecule inhibitors JQ-1 (1 $\mu$ M), rapamycin (1 $\mu$ M) for 3 hours prior to (A) C1498-EV<sup>AML</sup> and (B) AF9-EV<sup>AML</sup> challenge (n=3). Values expressed as mean $\pm$ s.d., Statistical significance calculated using Student's t-test. \* p<0.05.

# Supplementary Figure 7

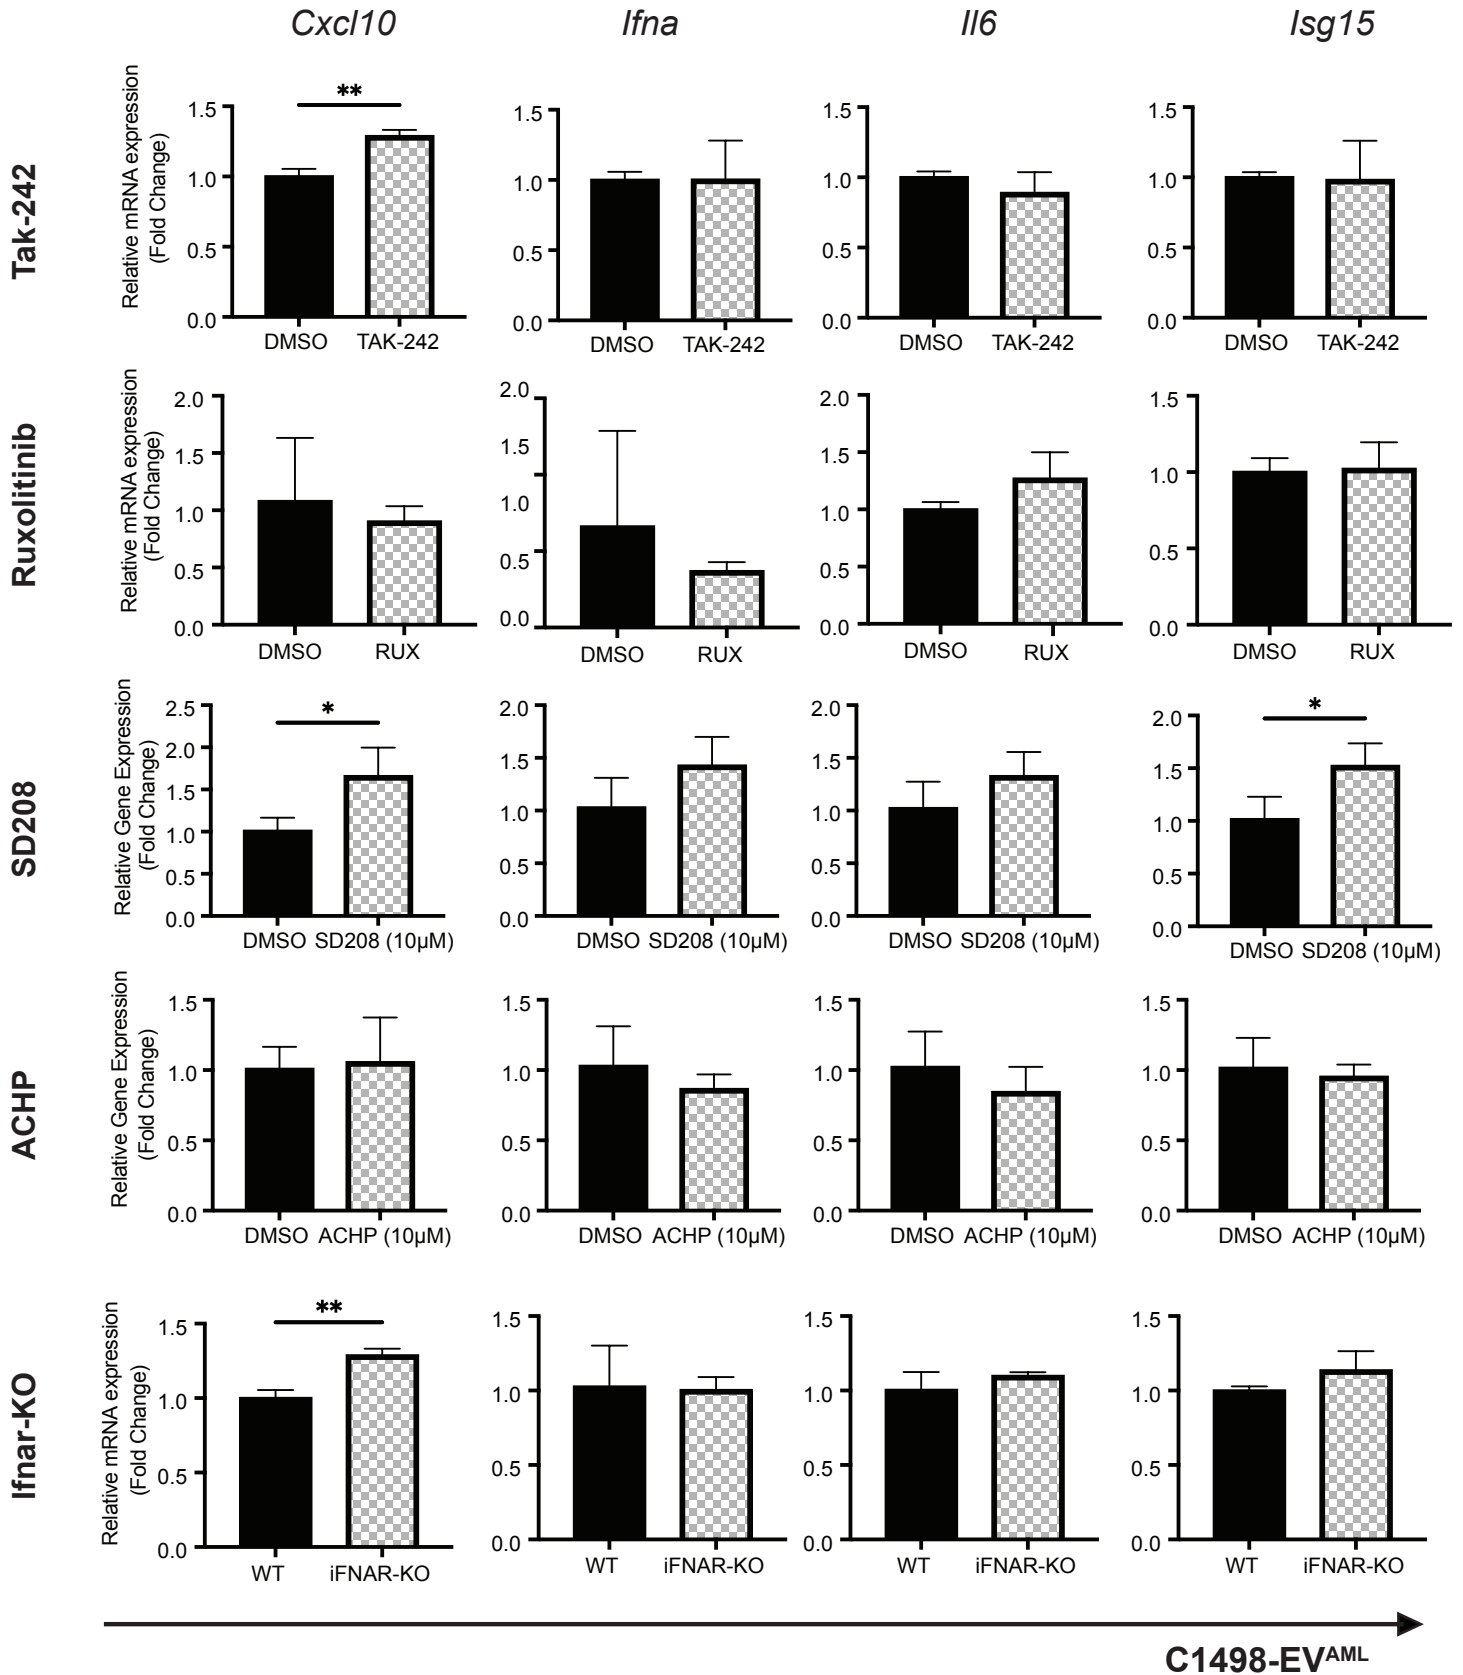

Supplementary Figure 7 - Additional inhibition study on C1498-EV<sup>AML</sup> mediated inflammation in HSPCs. FACS-sorted HSPCs were pretreated with either TAK2-42, ruxolitinib, SD208, or ACHP prior to C1498-EV<sup>AML</sup> challenge. To test the involvement of interferon alpha receptor, we subjected FACS-sorted IFNAR-KO HSPCs to C1498-EV<sup>AML</sup> challenge. (n=3) Values expressed as mean±s.d., Statistical significance calculated using Student's t-test. \* p<0.05; \*\* p<0.01.

# Supplementary Figure 8

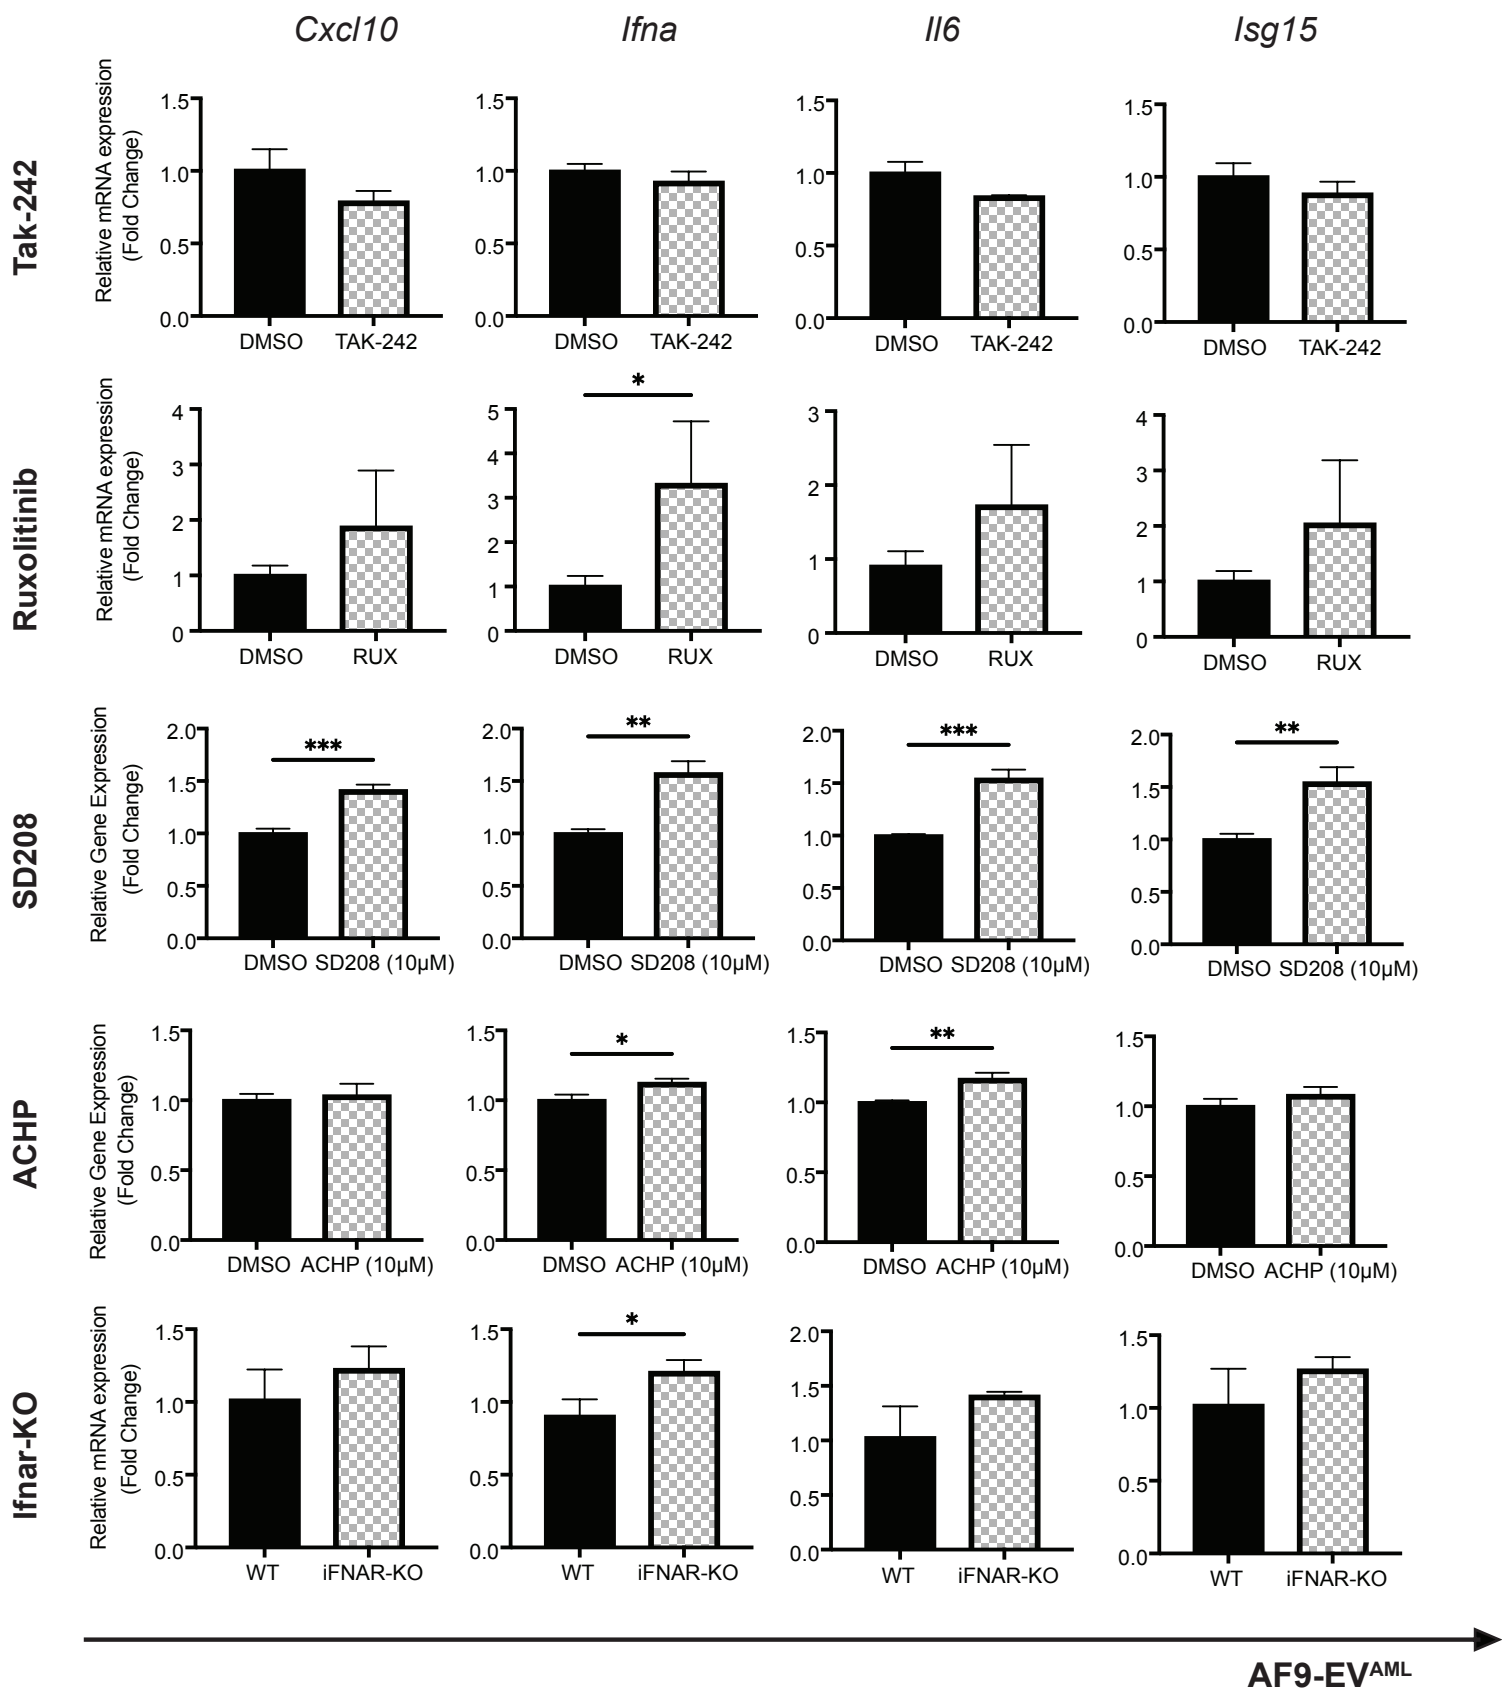

Supplementary Figure 8 - Additional inhibition study on AF9-EV<sup>AML</sup> mediated inflammation in HSPCs. FACS-sorted HSPCs were pretreated with either TAK2-42, ruxolitinib, SD208, or ACHP prior to AF9-EV<sup>AML</sup> challenge. To test the involvement of interferon alpha receptor, we subjected FACS-sorted IFNAR-KO HSPCs to AF9-EV<sup>AML</sup> challenge (n=3). Values expressed as mean±s.d., Statistical significance calculated using Student's t-test. \* p<0.05; \*\* p<0.01; \*\*\* p<0.001.



# Supplementary Figure 9

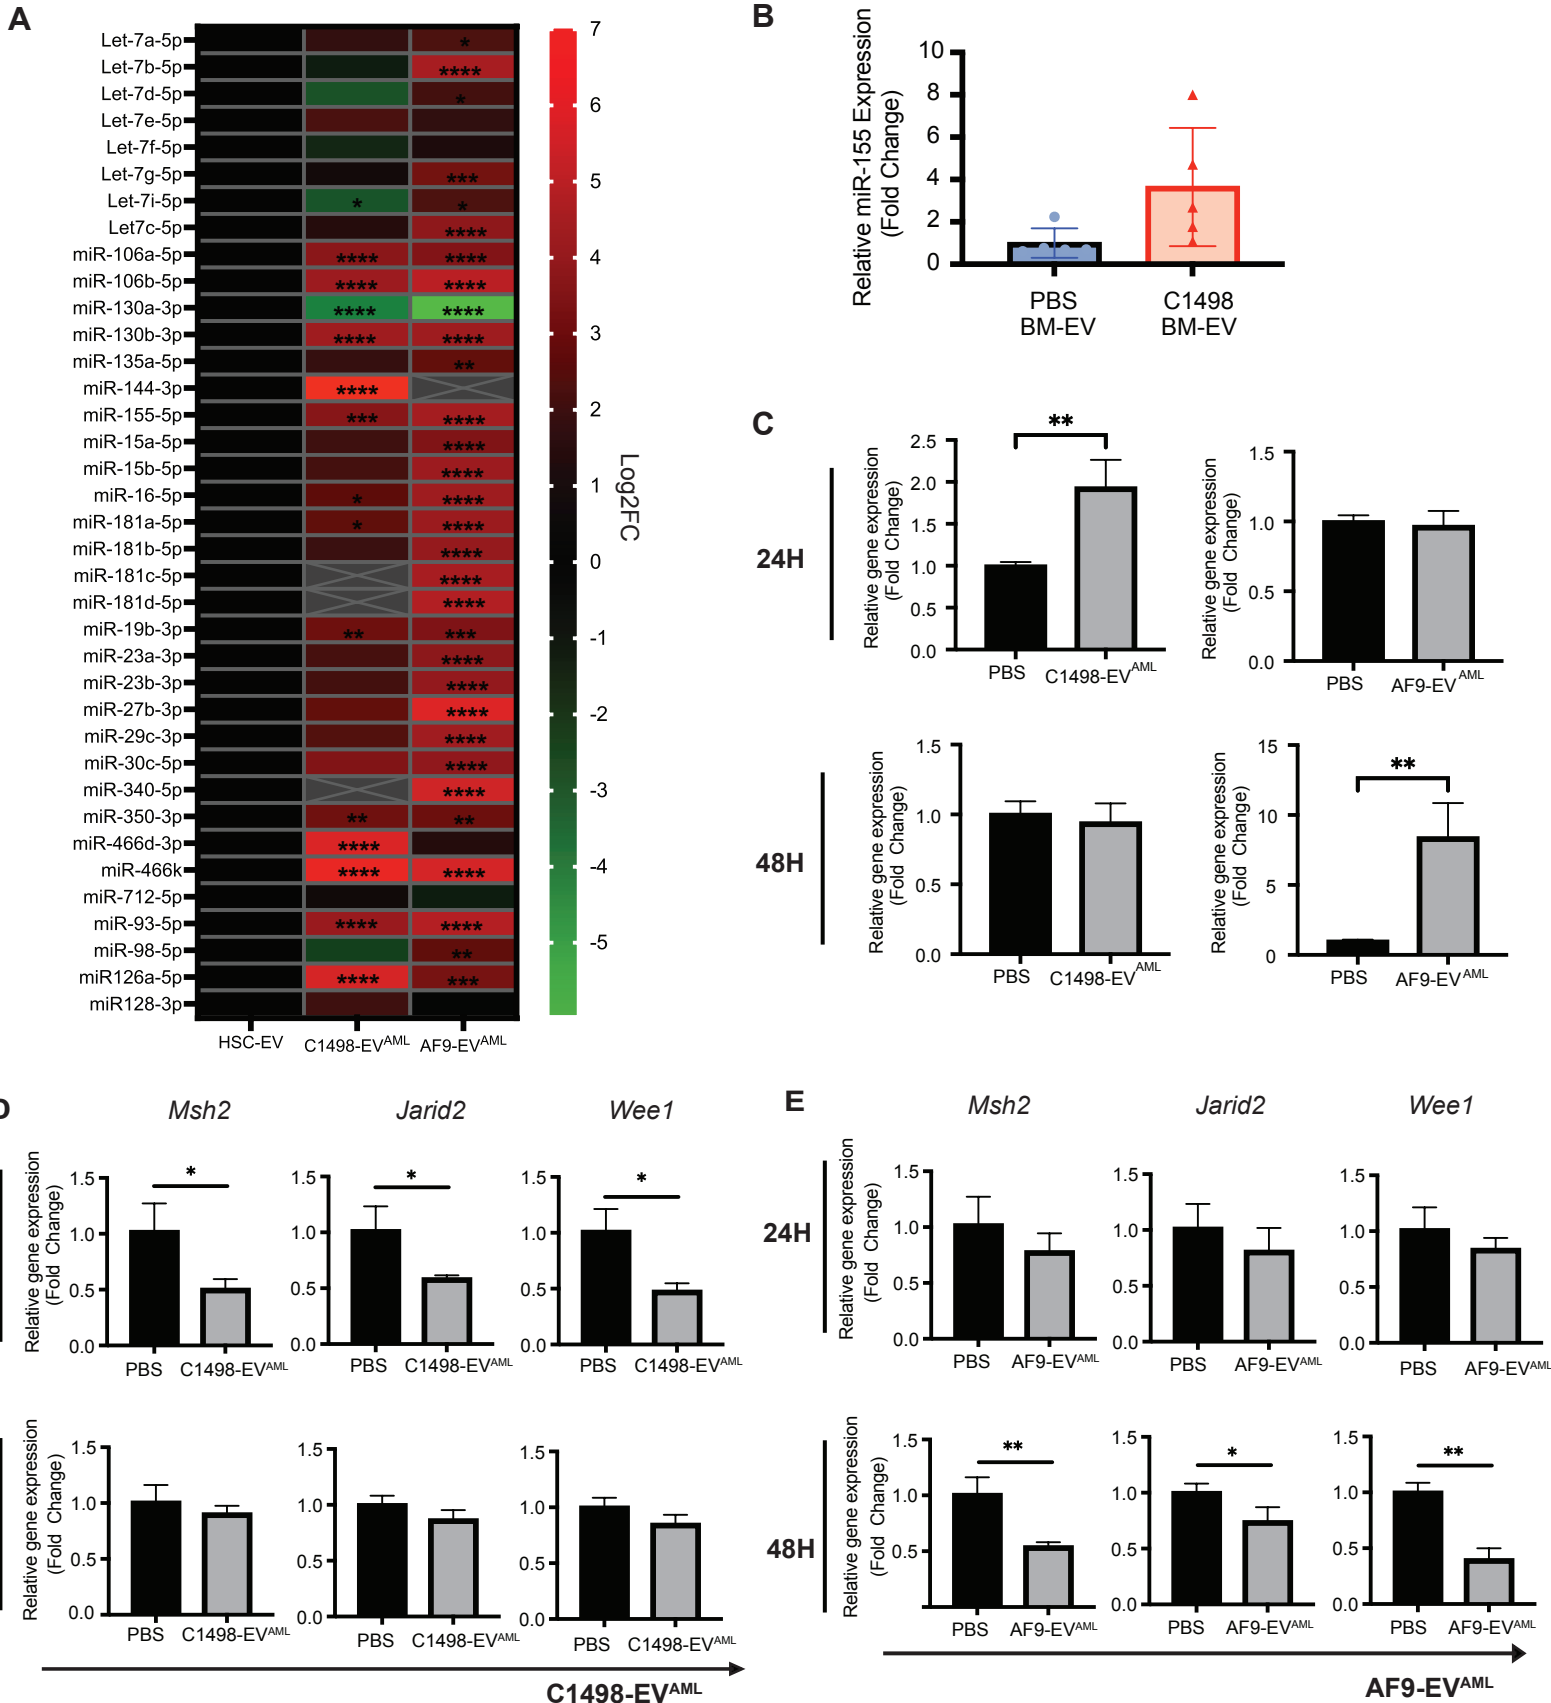

Supplementary Figure 9 - EV<sup>AML</sup> miRNA cargo analysis. (A) miRNA expression profile show enriched inflammation-related miRNAs in C1498-EV<sup>AML</sup> (n=2) and AF9-EV<sup>AML</sup> (n=3) cargo compared to HSC-derived EVs (n=3). Expressions are normalized to U6. (B) Enrichment of miR-155 in the BM-EV of C1498-engrafted mice (n=5). (C) Elevated miR-155 expression in C1498-EV<sup>AML</sup> and AF9-EV<sup>AML</sup>-challenged HSPCs at 24 and 48 hours. Gene expression analysis of HSPCs for miR-155 targets (D) 24 hours and (E) 48 hours post EV<sup>AML</sup> challenge (n=3). Values expressed as mean±s.d., Statistical significance calculated using Student's t-test. \* p<0.05; \*\* p<0.01.

# Supplementary Figure 10

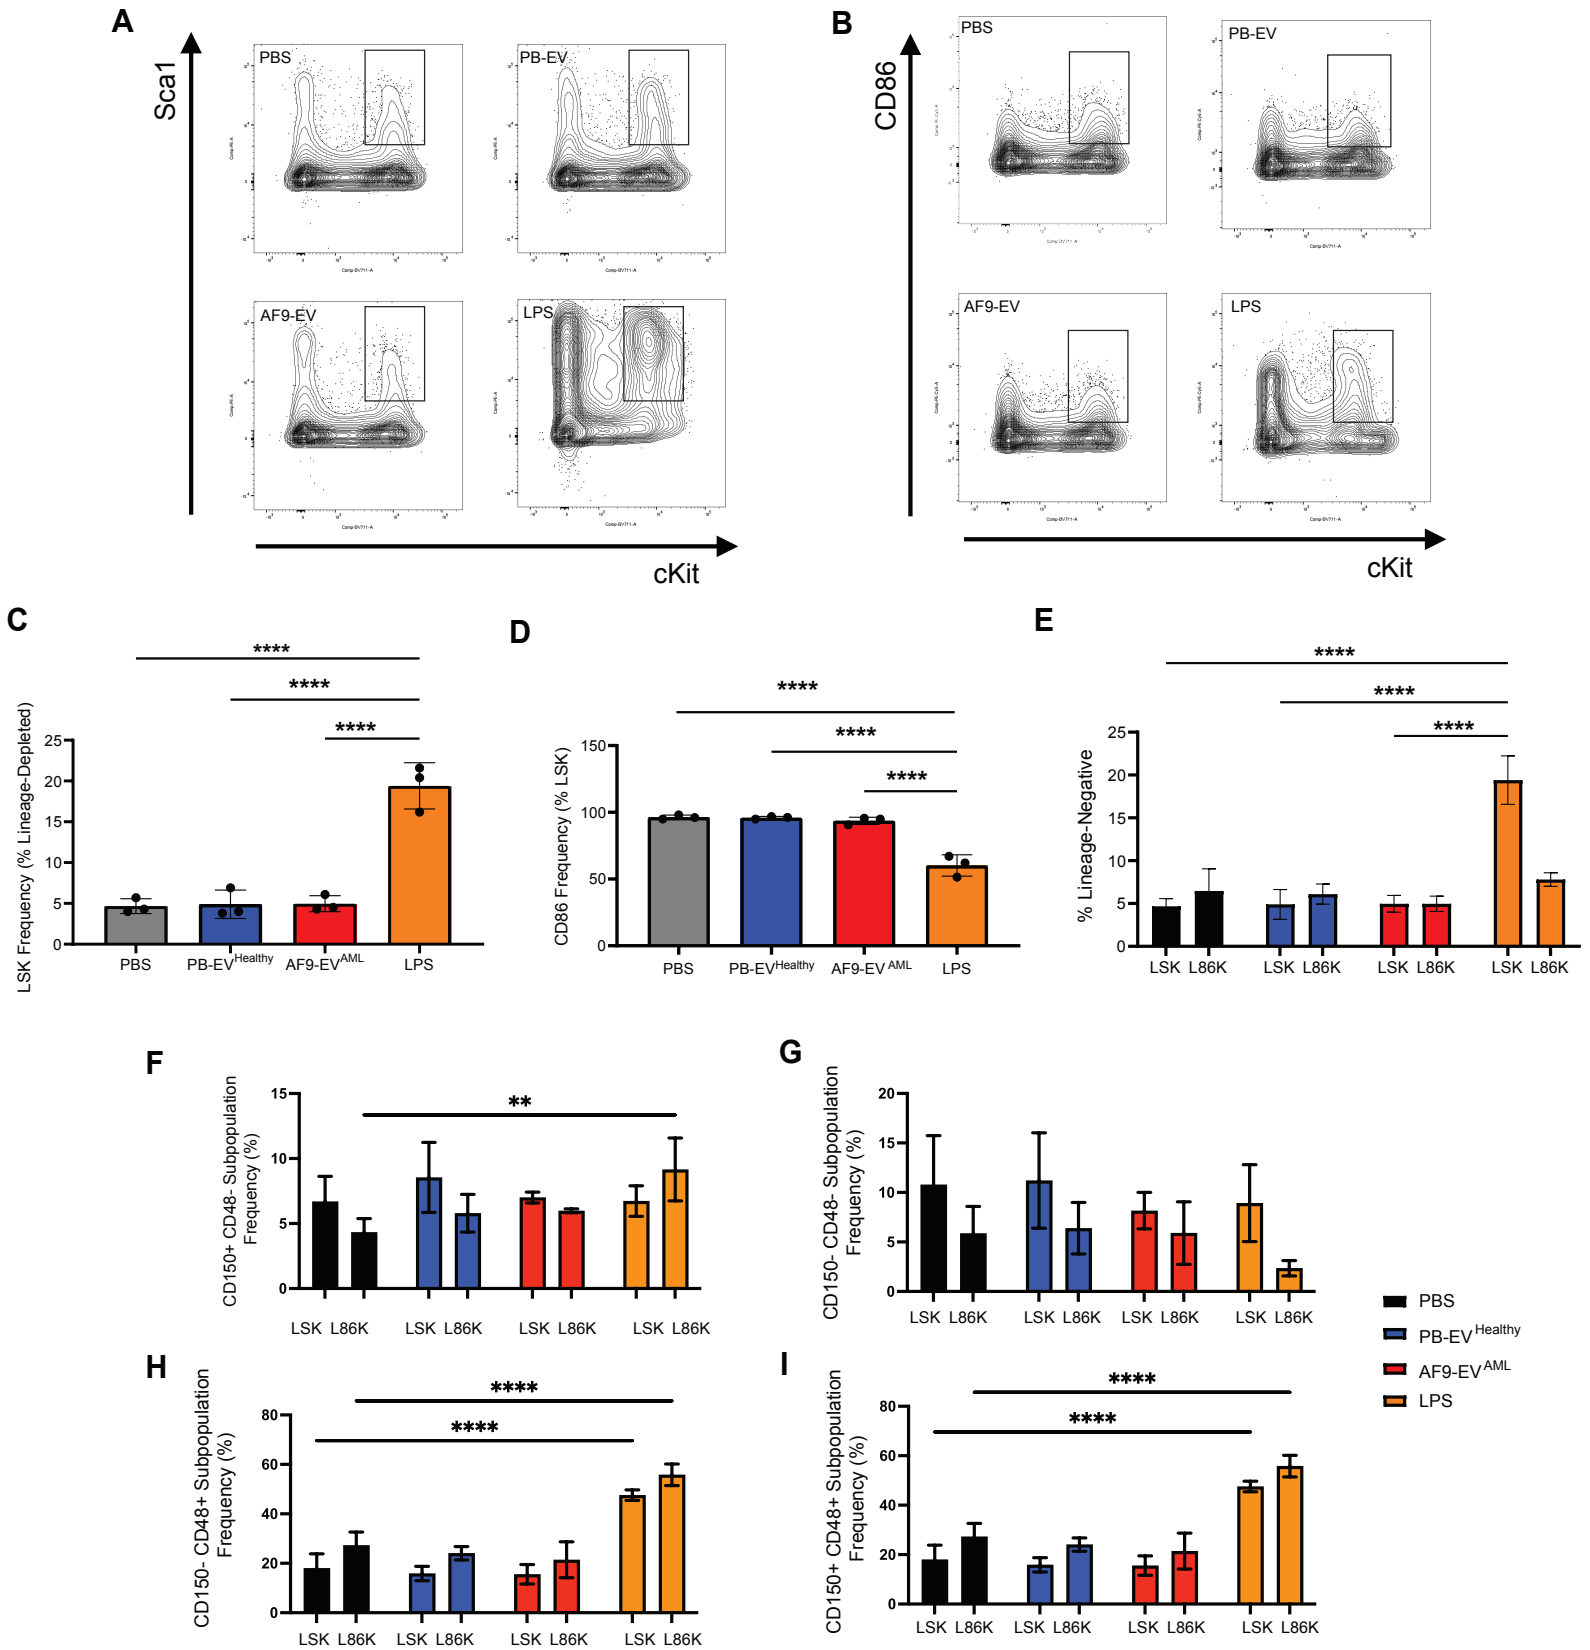

Supplementary Figure 10 – Analysis of LSK and L86K frequency following PBS, PB-EV<sup>Healthy</sup>, AF9-EV<sup>AML</sup>, and LPS challenge. Representative LSK (A) and L86K (B) flow cytometry gating. LSK Frequency (C), CD86 Frequency in LSK (D), comparative LSK and L86K frequency (E). HSPC subpopulation analysis in LSK and L86K fractions for: CD150+ CD48- population (F), CD150-CD48- population (G), CD150-CD48+ population (H), and CD150+CD48+ population (I). Values expressed as mean±s.d., Statistical significance calculated using ANOVA. \* p<0.05; \*\* p<0.01; \*\*\* p<0.001; \*\*\*\* p<0.0001.

**Supplementary Table 1 – List of Antibodies and Reagents Used**

| Name                                                          | Manufacturer          | Catalogue Number |
|---------------------------------------------------------------|-----------------------|------------------|
| <b>Antibody</b>                                               |                       |                  |
| Brilliant Violet 421™ anti-mouse CD45.1 Antibody (clone: A20) | BioLegend             | 110732           |
| Brilliant Violet 650™ anti-mouse CD45.2 Antibody (clone: 104) | BioLegend             | 109836           |
| FITC anti-mouse CD3a Antibody (clone: 500A2)                  | BioLegend             | 152304           |
| FITC anti-mouse CD11b Antibody (clone: M1/70)                 | BioLegend             | 101206           |
| FITC anti-mouse CD5 Antibody (clone: 53-7.3)                  | BioLegend             | 100606           |
| FITC anti-mouse CD4 Antibody (clone: Gk1.5)                   | BioLegend             | 100406           |
| FITC anti-mouse Gr-1 Antibody (clone: R86-8C5)                | BioLegend             | 108406           |
| FITC anti-mouse B220 Antibody (clone: RA3-6B2)                | BioLegend             | 103206           |
| PE anti-human CD271 (NGFR) Antibody (clone: ME20.4)           | BioLegend             | 345106           |
| PE anti-mouse CD117-PE Antibody (clone: 2B8)                  | BioLegend             | 105808           |
| APC Anti-mouse CD48 Antibody (clone: HM48-1)                  | BioLegend             | 103412           |
| APC/Cyanine7 anti-mouse Sca-1 Antibody (clone:D7)             | BioLegend             | 108126           |
| PE/Cyanine 7 anti-mouse CD150 Antibody (clone: TC15-12F12.2)  | BioLegend             | 115914           |
| PE/Cyanine 5 anti-mouse CD135 Antibody (clone: A2F10)         | BioLegend             | 135312           |
| <b>Medium / Cytokines</b>                                     |                       |                  |
| Dulbecco's Modified Eagle's Medium                            | Corning               | 10-013-CM        |
| RPMI 1640 Medium                                              | Gibco                 | 11875085         |
| BenchMark Fetal Bovine Serum                                  | GeminiBio             | 100-106          |
| Penicillin/Streptomycin                                       | Gibco                 | 10378016         |
| Doxycycline                                                   | Sigma                 | D9891            |
| StemSpan SFEM                                                 | STEMCELL Technologies | 09650            |
| StemSpan SFEM II                                              | STEMCELL Technologies | 09655            |
| Recombinant Murine Tpo                                        | Peprotech             | 315-14           |
| Recombinant Murine Flt3-l                                     | Peprotech             | 250-31L          |
| Recombinant Murine Scf                                        | Peprotech             | 250-03           |
| Recombinant Murine Il-3                                       | Peprotech             | 213-13           |

|                                                                                                                     |                       |          |
|---------------------------------------------------------------------------------------------------------------------|-----------------------|----------|
| Recombinant Murine IL-6                                                                                             | Peprotech             | 216-16   |
| Recombinant Human IL-6                                                                                              | Peprotech             | 200-06   |
| Recombinant Human FLT3-L                                                                                            | Peprotech             | 300-19   |
| Recombinant Human SCF                                                                                               | Peprotech             | 300-07   |
| Recombinant Human TPO                                                                                               | Peprotech             | 300-18   |
| StemRegenin1                                                                                                        | STEMCELL Technologies | 72344    |
| U171                                                                                                                | APEX BIO Technology   | A8950    |
| <b>Reagents / Kits</b>                                                                                              |                       |          |
| ACHP                                                                                                                | Bio-Techne            | 4547     |
| SD208                                                                                                               | Bio-Techne            | 3269     |
| JQ-1                                                                                                                | MedChemExpress        | HY-13030 |
| Actinomycin D                                                                                                       | Gibco                 | 11805017 |
| Rapamycin                                                                                                           | Alfa Aesar            | J62473   |
| EasySep™ Mouse Hematopoietic Progenitor Cell Isolation Kit                                                          | STEMCELL Technologies | 19856    |
| RNeasy Plus Micro Kit                                                                                               | Qiagen                | 74034    |
| miRNeasy Mini Kit                                                                                                   | Qiagen                | 217084   |
| SuperScript™ IV VILO™ Master Mix                                                                                    | Invitrogen            | 11756050 |
| PowerUp™ SYBR™ Green Master Mix for qPCR                                                                            | Applied Biosystems    | A25742   |
| TaqMan™ Fast Advanced Master Mix for qPCR                                                                           | Applied Biosystems    | 4444557  |
| TaqMan™ MicroRNA Reverse Transcription Kit                                                                          | Applied Biosystems    | 4366596  |
| RT <sup>2</sup> Profiler™ PCR Array Human Inflammatory Response & Autoimmunity (GeneGlobe ID: PAHS-077ZE-4)         | Qiagen                | 330231   |
| RT <sup>2</sup> First Strand Kit                                                                                    | Qiagen                | 330401   |
| RT <sup>2</sup> SYBR Green ROX qPCR Mastermix                                                                       | Qiagen                | 330521   |
| Mouse Inflammatory Response & Autoimmunity Focus V2, miRCURY LNA miRNA Focus PCR Panel (GeneGlobe ID: YAMM-205YE-2) | Qiagen                | 339325   |
| miRCURY LNA RT Kit                                                                                                  | Qiagen                | 339340   |
| miRCURY LNA SYBR Green PCR Kit                                                                                      | Qiagen                | 339345   |

Supplementary Table 2 - Sequences for quantitative PCR analysis primers

| <b>Gene</b>      | <b>Species</b> | <b>Sequence Direction</b> | <b>Sequence</b>         |
|------------------|----------------|---------------------------|-------------------------|
| <i>Isg15</i>     | Mus musculus   | Forward                   | GGAACGAAAGGGGCCACAGCA   |
|                  | Mus musculus   | Reverse                   | CCTCCATGGGCCTTCCCTCGA   |
| <i>Cxcl10</i>    | Mus musculus   | Forward                   | CCAAGTGCTGCCGTCATTTTC   |
|                  | Mus musculus   | Reverse                   | GGCTCGCAGGGATGATTTCAA   |
| <i>Gapdh</i>     | Mus musculus   | Forward                   | AGGTCGGTGTGAACGGATTTG   |
|                  | Mus musculus   | Reverse                   | TGTAGACCATGTAGTTGAGGTCA |
| <i>IFN-alpha</i> | Mus musculus   | Forward                   | CCTGAGAGAGAAGAAACACAGCC |
|                  | Mus musculus   | Reverse                   | TCTGCTTGACCACYTCCAG     |
| <i>Il-6</i>      | Mus musculus   | Forward                   | CCAAGAGGTGAGTGCTTCCC    |
|                  | Mus musculus   | Reverse                   | CTGTTGTTCAGACTCTCTCCCT  |
